# Supplementary material for: Proline Oxidation Supports Mitochondrial ATP Production When Complex I Is Inhibited
Source: Int J Mol Sci. 2022 May 4;23(9):5111. doi: 10.3390/ijms23095111 (PMC9106064; doi:10.3390/ijms23095111)
Supplement: Supplementary file 1 [file ijms-23-05111-s001.zip]

Archive with 15 entries (15 files):
- supplementary figure 11.TIF
- supplementary figure 12.TIF
- supplementary figure 13.TIF
- supplementary figure S1.tiff
- supplementary figure S10.tiff
- supplementary figure S2.tiff
- supplementary figure S3.TIF
- supplementary figure S4.tiff
- supplementary figure S5.TIF
- supplementary figure S6.tiff
- supplementary figure S7.tiff
- supplementary figure S8.tiff
- supplementary figure S9.tiff
- Supplementary material (supplementary figures and their legends)_IJMS.pdf
- Supplementary table S1.xlsx
