# Supplementary material for: Proline Oxidation Supports Mitochondrial ATP Production When Complex I Is Inhibited
Source: Int J Mol Sci. 2022 May 4;23(9):5111. doi: 10.3390/ijms23095111 (PMC9106064; doi:10.3390/ijms23095111)
Supplement: Supplementary file 1 [file ijms-23-05111-s001.zip › Supplementary table S1.xlsx]

## Sheet: Supplementary Table S1
Pallag G, Nazarian S, Ravasz D, Bui D, Komlódi T, Doerrier C, Gnaiger E, Seyfried TN, Chinopoulos C (2022) Proline oxidation leading to high electron flow through reduction of ubiquinone supports ATP production by F1FO-ATPase in mitochondria with inhibited Complex I.
Liver	Fig 2F	Pro: 2 mM		S: 5 mM		SPro: 5 mM S + 2 mM Pro			S+Pro	SPro/(S+Pro)	Pro/SPro	S/SPro	Additivity
		LEAK	OXPHOS	LEAK	OXPHOS	LEAK	OXPHOS				Eq. 7.1 β	Eq. 7.1 α	Eq: 7.2
	pmol∙s-1∙mg-1	217.191	810.655	335.967	1071.61	645.307	3069.97
		390.186	957.987	293.702	1218.68	447.916	2505.52
		194.645	870.288	344.966	1202.55	500.855	3041.3
		371.51	1089.59	335.591	1542.19	671.036	3387.18
		338.564	926.593			401.527	2023.48
		156.523	556.122
	Median		898.441		1210.61		3041.3	OXPHOS	2109.05	1.44202	0.295414	0.398058	2.03762
	Mean		868.539		1258.76		2805.49		2127.3	1.3188	0.309586	0.448677	1.78084
	Median	277.878		335.779		500.855		LEAK	613.656	0.816182	0.554806	0.670411	0.594062
	Mean	278.103		327.557		533.328			605.66	0.880574	0.521449	0.614175	0.739911
Liver	Fig 2G	Pro: 5 mM		S: 5 mM		SPro: 5 mM S + 5 mM Pro			S+Pro	SPro/(S+Pro)	Pro/SPro	S/SPro	Additivity
		LEAK	OXPHOS	LEAK	OXPHOS	LEAK	OXPHOS
	pmol∙s-1∙mg-1	218.959	753.571	335.967	1071.61	564.855	2974.24
		203.599	896.881	293.702	1218.68	417.707	2440.89
		300.052	1406.16	344.966	1202.55	872.693	4969.44
		179.394	906.248	335.591	1542.19	607.342	3428.83
		200.26	899.505			368.994	1990.77
		223.351	886.384
		156.648	1052.32
		368.856	1169.56
		348.772	1218.38
		197.341	794.386
		227.668	819.447
		309.868	970.343
		372.789	1283.47
	Median		906.248		1210.61		2974.24	OXPHOS	2116.86	1.40502	0.304699	0.407032	1.94608
	Mean		1004.36		1258.76		3160.83		2263.12	1.39667	0.317751	0.398236	1.89382
	Median	223.351		335.779		564.855		LEAK	559.13	1.01024	0.395413	0.594451	1.02563
	Mean	254.427		327.557		566.318			581.984	0.973082	0.449266	0.578397	0.938428
Kidney	Fig 2K	Pro: 2 mM		S: 5 mM		SPro: 5 mM S + 2 mM Pro			S+Pro	SPro/(S+Pro)	Pro/SPro	S/SPro	Additivity
		LEAK	OXPHOS	LEAK	OXPHOS	LEAK	OXPHOS
	pmol∙s-1∙mg-1	119.193	808.866	1232.93	3434.88	946.265	4287.9
		232.812	716.699	990.604	2217.28	909.351	3475.43
		263.226	733.674	944.61	2366.92	850.585	4164.21
		213.626	641.164	786.509	1903.97	755.824	3007.48
	Median		725.186		2292.1		3819.82	OXPHOS	3017.29	1.26598	0.189848	0.600055	2.10666
	Mean		725.101		2480.76		3733.75		3205.86	1.16466	0.194202	0.664415	1.72802
	Median	223.219		967.607		879.968		LEAK	1190.83	0.738956	0.253667	1.09959	-0.392613
	Mean	207.214		988.664		865.506			1195.88	0.723741	0.239414	1.1423	-0.59435
Kidney	Fig 2L	Pro: 5 mM		S: 5 mM		SPro: 5 mM S + 5 mM Pro			S+Pro	SPro/(S+Pro)	Pro/SPro	S/SPro	Additivity
		LEAK	OXPHOS	LEAK	OXPHOS	LEAK	OXPHOS
	pmol∙s-1∙mg-1	188.311	1088.19	1232.93	3434.88	1119.85	5204.61
		376.602	987.02	990.604	2217.28	993.164	4072.07
		322.005	907.249	944.61	2366.92	802.209	3869.45
		301.949	729.082	786.509	1903.97	798.891	3793.19
		760.793	1883.75
		384.226	1093.73
	Median		1037.61		2292.1		3970.76	OXPHOS	3329.71	1.19253	0.261312	0.577244	1.61782
	Mean		1114.84		2480.76		4234.83		3595.6	1.17778	0.263255	0.5858	1.57338
	Median	349.304		967.607		897.687		LEAK	1316.91	0.681661	0.389115	1.07789	-0.20017
	Mean	388.981		988.664		928.528			1377.65	0.673996	0.418922	1.06477	-0.154599
	Equations:	https://www.bioenergetics-communications.org/index.php/bec/article/view/gnaiger_2020_mitopathways
	Gnaiger E (2020) Mitochondrial pathways and respiratory control. An introduction to OXPHOS analysis. 5th ed. Bioenerg Commun 2020.2:112 pp. https://doi.org/10.26124/bec:2020-0002
